# Supplementary material for: Geographic and Temporal Variability of Hepatitis E Virus Circulation in the Russian Federation
Source: MDPI journal article supplement (doi:10.3390/v15010037), 2022-12-22
Supplement: s1 [file s1]

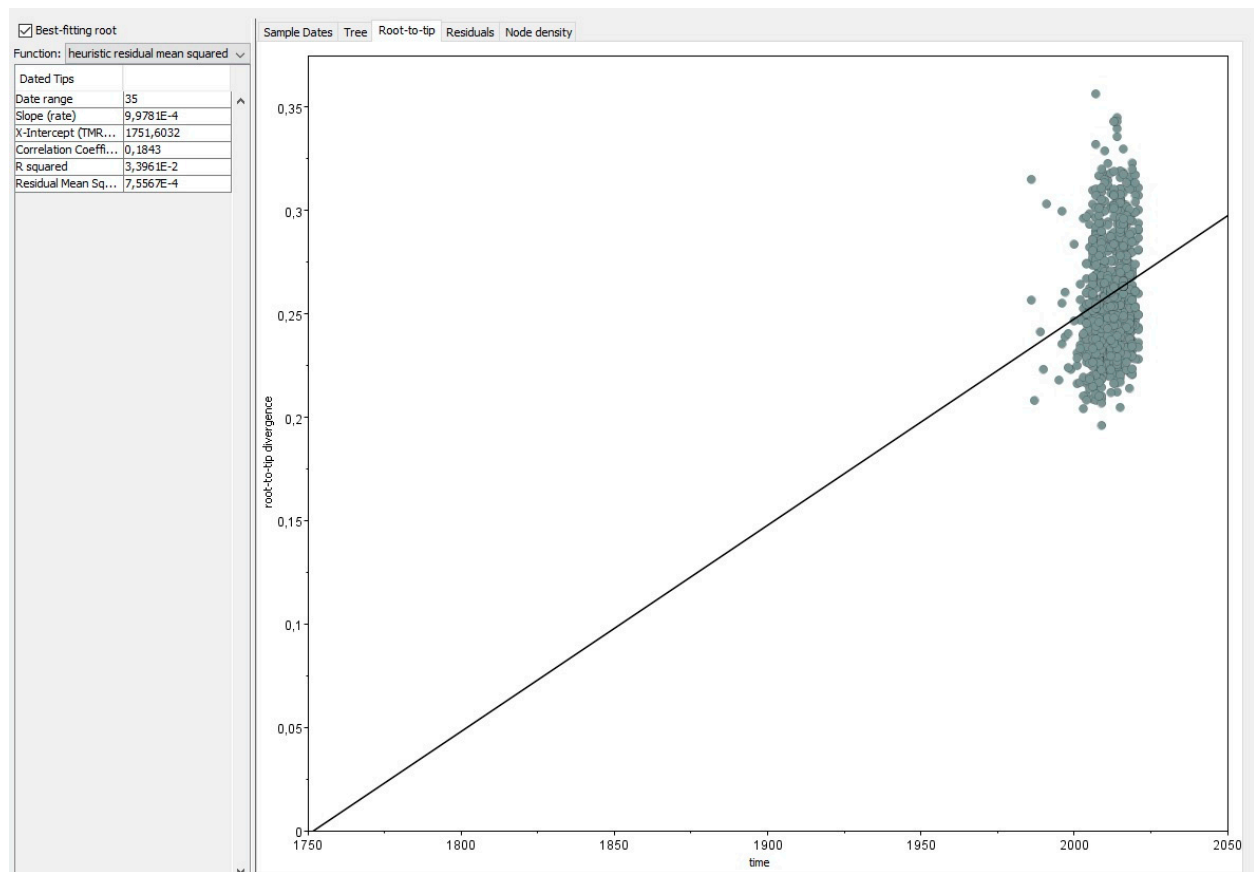

Supplementary figure S1. Temporal signal linear regression graph for HEV-3 ORF-2 300 nt fragment.

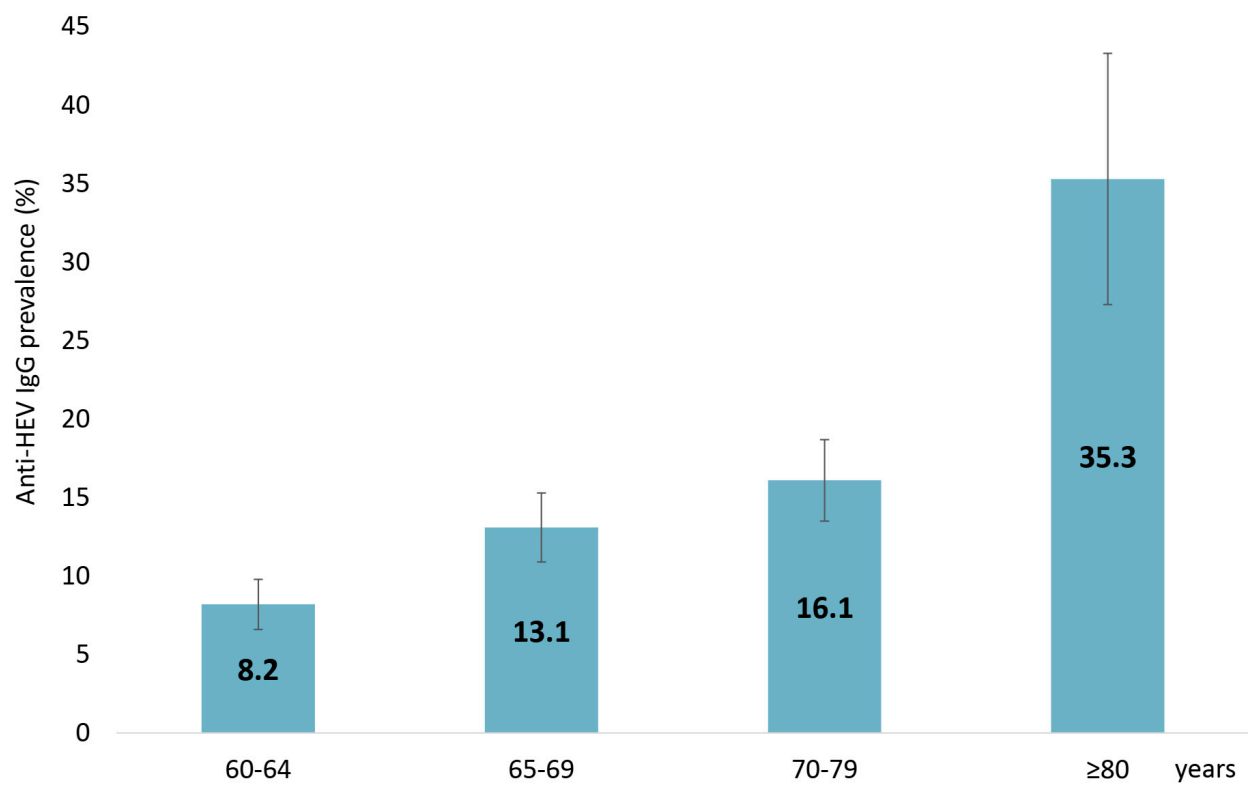

Supplementary figure S2. Age-specific anti-HEV IgG antibody prevalence rates in elderly participants from the regions studied in 2018-2020. Error bars on the bar graphs represent 95% CI.

Supplementary table S1. Anti-HEV IgG antibody positivity rates in age cohorts of healthy volunteers in regions of the Russian Federation

| Region                      | Year | Anti-HEV IgG<br>N positive/N tested (%) in age cohorts |                  |                   |                   |                   |                   |                    |
|-----------------------------|------|--------------------------------------------------------|------------------|-------------------|-------------------|-------------------|-------------------|--------------------|
|                             |      | 1-14<br>years                                          | 15-19<br>years   | 20-29<br>years    | 30-39<br>years    | 40-49<br>years    | 50-59<br>years    | ≥ 60<br>years      |
| Kaliningrad Region          | 2019 | 1/399<br>(0.3%)                                        | 3/104<br>(2.9%)  | 5/103<br>(4.9%)   | 12/129<br>(9.3%)  | 17/116<br>(14.7%) | 17/99<br>(17.2%)  | 25/100<br>(25.0%)  |
| St. Petersburg              | 2020 | 3/467<br>(0.6%)                                        | 2/129<br>(1.6%)  | 40/1455<br>(2.7%) | 82/1961<br>(4.2%) | 39/669<br>(5.8%)  | 21/401<br>(5.2%)  | 23/246<br>(9.3%)   |
| Belgorod Region             | 2019 | 1/159<br>(0.6%)                                        | 11/193<br>(5.7%) | 7/124<br>(5.6%)   | 9/135<br>(6.7%)   | 17/121<br>(14.1%) | 26/132<br>(19.7%) | 48/134<br>(35.8%)  |
| Dagestan Republic           | 2020 | 31/1985<br>(1.6%)                                      | 8/545<br>(1.5%)  | 6/755<br>(0.8%)   | 6/550<br>(1.1%)   | 7/277<br>(2.5%)   | 10/307<br>(3.3%)  | 135/530<br>(25.2%) |
| Moscow Region               | 2008 | 19/455<br>(4.2%)                                       | 4/152<br>(2.6%)  | 3/104<br>(2.9%)   | 5/100<br>(5.0%)   | 6/105<br>(5.7%)   | 10/114<br>(8.8%)  | 42/149<br>(28.2%)  |
|                             | 2020 | 3/714<br>(0.4%)                                        | 4/212<br>(1.9%)  | 56/2012<br>(2.8%) | 110/2751<br>(4.0) | 60/1044<br>(5.7%) | 40/490<br>(8.2%)  | 24/268<br>(9.0%)   |
| Tatarstan Republic          | 2020 | 4/271<br>(1.5%)                                        | 6/93<br>(6.5%)   | 15/103<br>(14.6%) | 21/112<br>(18.8%) | 14/108<br>(13.0%) | 13/111<br>(11.7%) | 18/119<br>(15.1%)  |
| Sverdlovsk Region           | 2008 | 2/421<br>(0.5%)                                        | 1/100<br>(1.0%)  | 1/81<br>(1.2%)    | 4/106<br>(3.8%)   | 5/104<br>(4.8%)   | 5/107<br>(4.7%)   | 9/108<br>(8.3%)    |
|                             | 2021 | 5/233<br>(2.2%)                                        | 0/204<br>(0.0%)  | 1/51<br>(2.0%)    | 11/147<br>(7.5%)  | 7/102<br>(6.9%)   | 8/99<br>(8.1%)    | 10/99<br>(10.1%)   |
| Tuva Republic               | 2008 | 3/388<br>(0.8%)                                        | 2/100<br>(2.0%)  | 3/100<br>(3.0%)   | 9/100<br>(9.0%)   | 6/100<br>(6.0%)   | 12/100<br>(12.0%) | 19/123<br>(15.5%)  |
|                             | 2019 | 7/359<br>(1.9%)                                        | 4/167<br>(2.4%)  | 4/147<br>(2.7%)   | 7/169<br>(4.1%)   | 7/112<br>(6.3%)   | 19/108<br>(17.6%) | 20/99<br>(20.2%)   |
| Novosibirsk Region          | 2020 | 16/2096<br>(0.8%)                                      | 13/913<br>(1.4%) | 40/1602<br>(2.5%) | 35/1615<br>(2.2%) | 22/829<br>(2.7%)  | 22/519<br>(4.2%)  | 79/757<br>(10.4%)  |
| Sakha Republic<br>(Yakutia) | 2008 | 2/406<br>(0.5%)                                        | 0/100<br>(0.0%)  | 2/123<br>(1.6%)   | 1/100<br>(1.0%)   | 3/100<br>(3.0%)   | 2/99<br>(2.0%)    | 11/97<br>(11.3%)   |
|                             | 2018 | 7/402<br>(1.7%)                                        | 2/99<br>(2/0%)   | 8/117<br>(6.8%)   | 6/119<br>(5.0%)   | 4/101<br>(4/0%)   | 12/116<br>(10.3%) | 13/118<br>(11.0%)  |
| Khabarovsk Region           | 2008 | 2/397<br>(0.5%)                                        | 3/99<br>(3.0%)   | 1/101<br>(1.0%)   | 3/99<br>(3.0%)    | 2/100<br>(2.0%)   | 3/100<br>(3.0%)   | 8/99<br>(8.1%)     |
|                             | 2020 | 17/1770<br>(1.0%)                                      | 13/527<br>(2.5%) | 24/713<br>(3.4%)  | 27/624<br>(4.3%)  | 15/294<br>(5.1%)  | 19/333<br>(5.7%)  | 41/509<br>(8.1%)   |

Supplementary table S2. HEV RNA detection rates in piglets aged 2-4 months

| Region      | Farm #   | Number of faecal samples | Number of HEV RNA positive samples (%) |
|-------------|----------|--------------------------|----------------------------------------|
| Kaliningrad | 1        | 57                       | 5 (8.77%)                              |
|             | 2        | 64                       | 28 (43.75%)                            |
|             | 3        | 76                       | 0 (0.00%)                              |
|             | 4        | 60                       | 0 (0.00%)                              |
| Arkhangelsk | 1        | 37                       | 9 (24.32%)                             |
|             | 2        | 81                       | 19 (23.46%)                            |
|             | 3        | 137                      | 24 (17.52%)                            |
| Belgorod    | 1        | 69                       | 5 (7.25%)                              |
|             | 2        | 107                      | 4 (3.74%)                              |
|             | 3        | 101                      | 50 (49.50%)                            |
|             | 4 (2012) | 74                       | 17 (22.97%)                            |
|             | 4 (2013) | 75                       | 19 (25.33%)                            |
|             | 4 (2016) | 100                      | 20 (20.00%)                            |
| Vladimir    | 1        | 43                       | 26 (60.47%)                            |
| Saratov     | 1        | 99                       | 7 (7.07%)                              |
|             | 2        | 92                       | 28 (30.43%)                            |
|             | 3        | 91                       | 45 (49.45%)                            |
| Sverdlovsk  | 1        | 52                       | 20 (38.46%)                            |
|             | 2        | 100                      | 5 (5.00%)                              |
|             | 3        | 82                       | 5 (6.10%)                              |
| Khabarovsk  | 1        | 128                      | 26 (20.31%)                            |
|             | 2        | 107                      | 0 (0.00%)                              |
|             | 3        | 84                       | 2 (2.38%)                              |
